# Supplementary material for: Two-step spray-drying synthesis of dense and highly luminescent YAG:Ce3+ phosphor powders with spherical shape
Source: Royal Society of Chemistry journal article supplement (doi:10.1039/c4ra14302g), 2014-12-15
Supplement: c4ra14302g1.pdf [file c4ra14302g1.pdf]

## Supporting Information

### Two-step spray-drying synthesis of dense and highly luminescent YAG:Ce<sup>3+</sup> phosphor powder particles with spherical shape

Jung Sang Cho<sup>[a]</sup>, Kyeong Youl Jung<sup>[b]</sup>, Yun Chan Kang<sup>\*[a]</sup>

<sup>[a]</sup> Department of Materials Science and Engineering, Korea University, Anam-Dong, Seongbuk-Gu, Seoul 136-713, Republic of Korea

<sup>[b]</sup> Department of Chemical Engineering, Kongju National University, 275 Budae-Dong, cheonan, Chungnam 330-717, Republic of Korea

#### **This file includes:**

**Figure S1.** Schematic diagram and digital photo of spray dryer applied in the preparation of precursor powders.

**Figure S2.** TG analysis of the YAG:Ce<sup>3+</sup> precursor powders directly prepared by first-step spray drying.

**Figure S3.** Particle size distributions of the YAG:Ce<sup>3+</sup> phosphor powders before and after thermal-treatment process.

**Figure S4.** N<sub>2</sub> adsorption-desorption isotherms measured at 77 K for the YAG:Ce<sup>3+</sup> phosphor powders formed at the various sintering temperatures.

**Figure S5.** XRD patterns of the YAG:Ce<sup>3+</sup> phosphor powders formed at the various sintering temperatures.

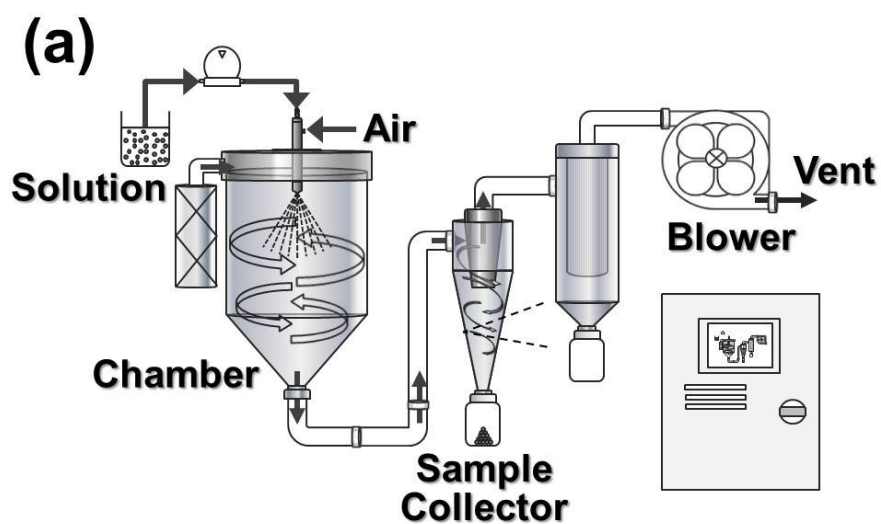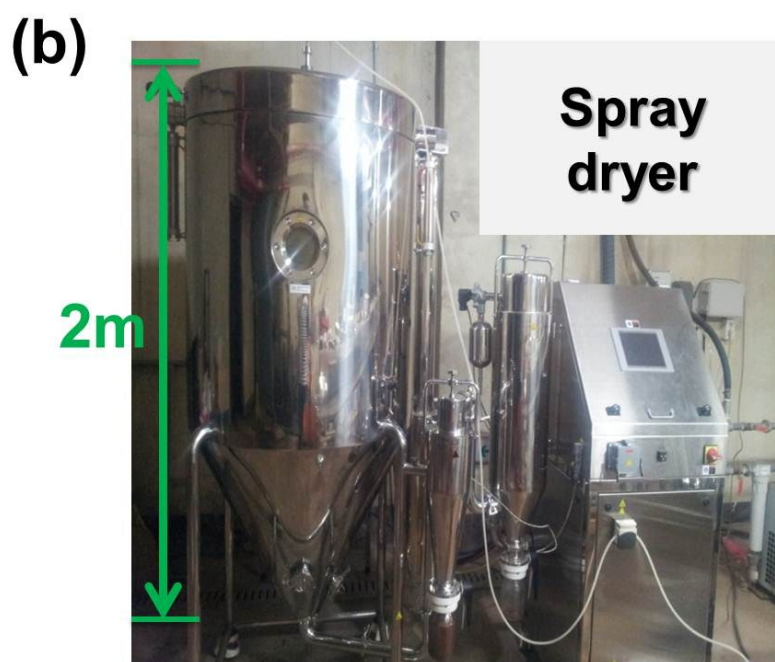

**Figure S1.** Schematic diagram and digital photo of spray dryer applied in the preparation of precursor powders.

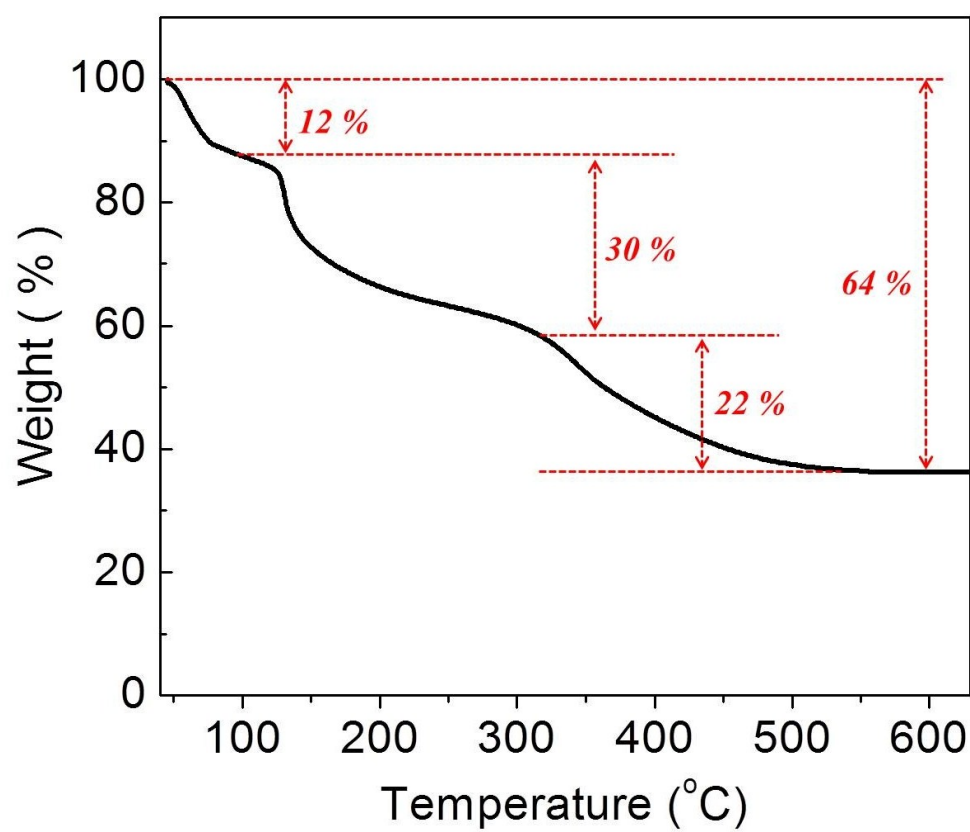

**Figure S2.** TG analysis of the YAG:Ce<sup>3+</sup> precursor powders directly prepared by first-step spray drying.

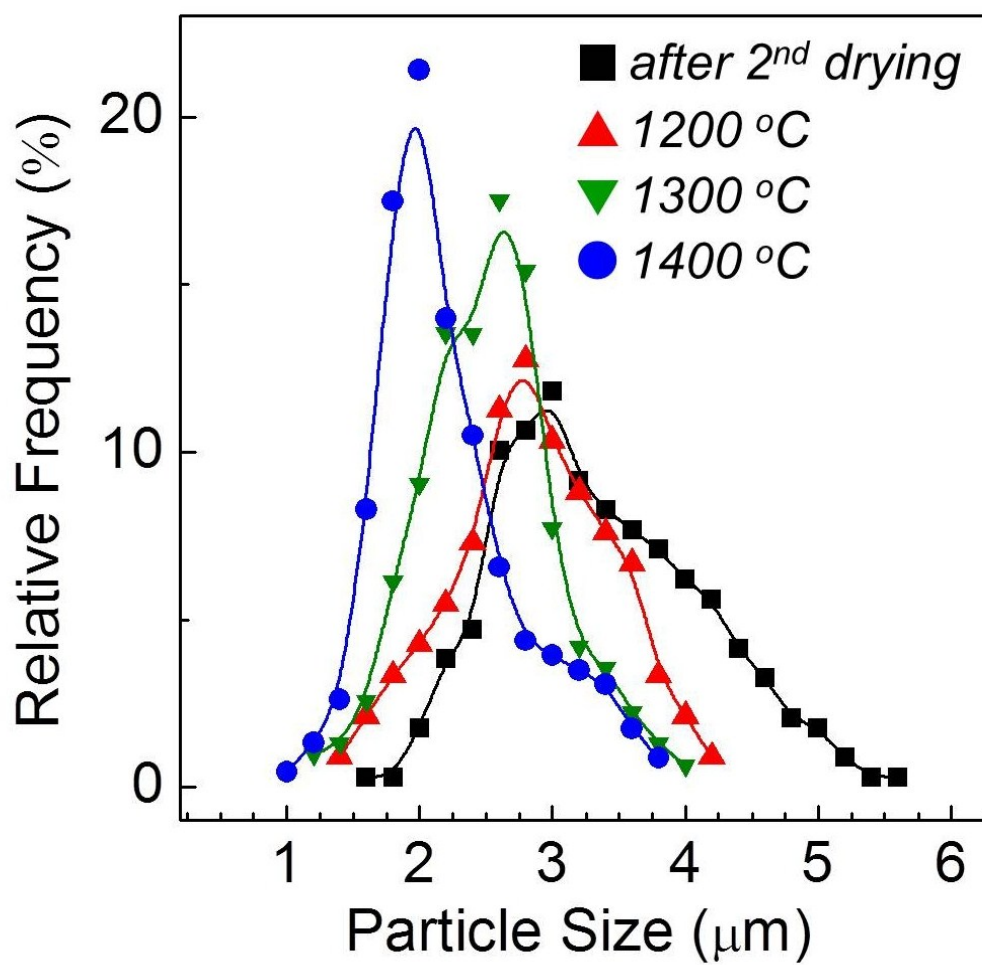

**Figure S3.** Particle size distributions of the YAG:Ce<sup>3+</sup> phosphor powders before and after thermal-treatment process.

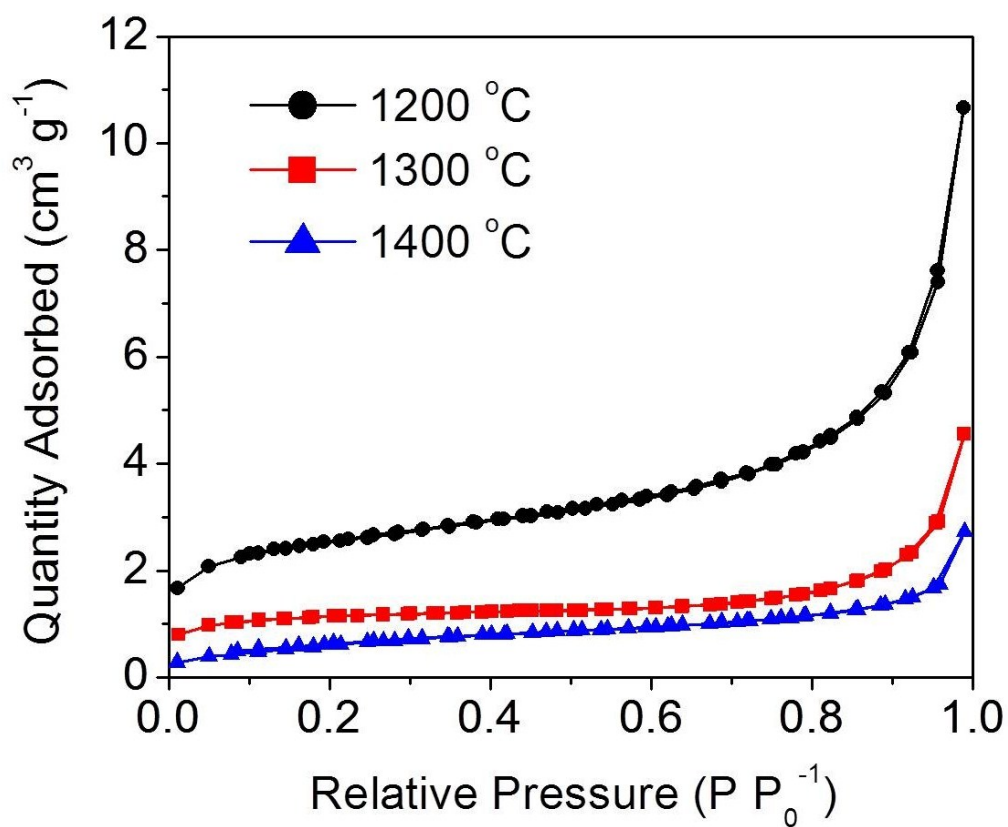

**Figure S4.** N<sub>2</sub> adsorption-desorption isotherms measured at 77 K for the YAG:Ce<sup>3+</sup> phosphor powders formed at the various sintering temperatures.

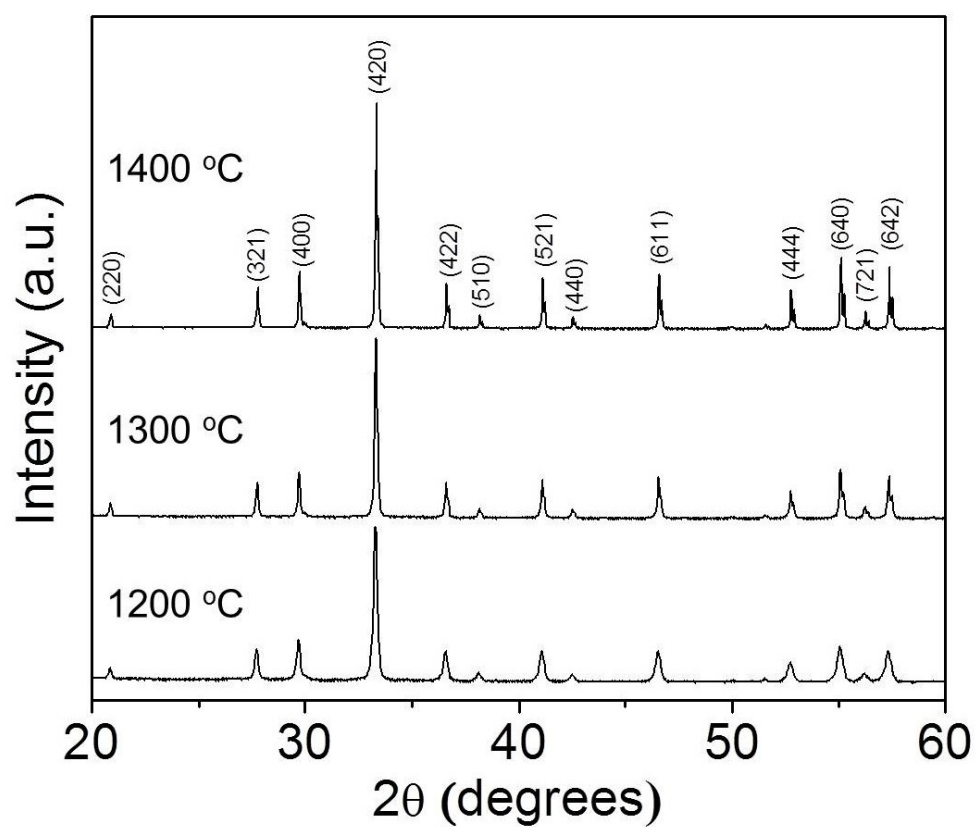

**Figure S5.** XRD patterns of the YAG:Ce<sup>3+</sup> phosphor powders formed at the various sintering temperatures.
